# Supplementary material
Source: PubMed Central journal article supplement (PMC3127645)
Supplement: supp_10_4_502__1.pdf [file supp_10_4_502__1.pdf]

# A.

CaSch9 1 MVDFAKSLFGFGNYKKESSLQSPTPPPSAHSSQEQHHSNTTEYPQSHLS  
ScSch9 1 MMNF-----FTSKSSNQD-----TGFSSQHQH--PNGQNGNNNS

CaSch9 51 QQQSHRYQPPHMEQSHQFPQQQQQQQSGTNKFFPKTLVSAAPTAVA  
ScSch9 35 TAGNDNGYPCKLVS SG----PCASSNNGALFTN----FTLQTATPTAIS

CaSch9 101 NHSSVYGTTSTTTNNYPEAYLNQTFKNNIYNPQQQQQQAQQPPPEQQS  
ScSch9 77 QDLYAMGTTGITSEN--ALFQMKSMNGLSSVNNNSNTPTIITTSQEEET

CaSch9 151 SAPYQNSANIQQPYGNQWGSS--QDQDANIITIDKTGNKLSPASR-----  
ScSch9 125 -----NAGNV---HGDTGCGNSLQNSEDDNFSSSSTTKCLLSSTSSLSINQ

CaSch9 194 -----DSPIKGKCLKVTILEAKDIFA----TOPYVVC SFESSEFV  
ScSch9 167 REAAAAAYGPDIDIPRGKLEVTIIEARDLVTRSKDSQPYVVCIFESSEFI

CaSch9 229 TNAPDSYGKSPVSSFGHNNNQGHNGPRNMYNSNHGSPKALPMKNSGN--  
ScSch9 217 SNGPESLGA INNNNNNNNNNQ--HNQNH INNNNENTNPD AASQHHNNNSG

CaSch9 277 -----LFGQRPSMYQRQL-----STPH  
ScSch9 266 WNGSQLPSIKEHLKKKPLYTHRSSQLDQLNSC SSVTDPSKRSSNS SSGS

CaSch9 294 LNL P-NDSSNPIWNHDTIFDVVGSKSELDISVYD GARDDAFLGHVRI SPS  
ScSch9 316 SNGPKNDSSHP IWHHKTIIFDVLGSHSELDISVYDAAHDMFLGQVRLYPM

CaSch9 343 TDK--NNKNESEWLQLGARITGETVSSGHIKIKWEYTSFDNNIKRSYGPDD  
ScSch9 366 IHNLAHASQHQWHS LKPRVIDEVV--SGDILIKWTY---KQTKKRHYGPQD

CaSch9 392 FHFRLRLGKGTFGQVFQVRKKDTNRVYAMKILSKKVI VKKKEIAHTIGER  
ScSch9 412 FEVRLRLGKGTFGQVYQVKKKDTQRIIYAMKVL SKKVI VKKNEIAHTIGER

CaSch9 442 NILVRTSAASSPFIVGLKFSFQTPSDLFLVTD FMSGGELF FHLQKEGRFN  
ScSch9 462 NILVTTASKSSPFIVGLKFSFQTPIDLVLVTDYMSGGELFWHLQKEGRFS

CaSch9 492 EDRSKFYTAELI LLALEHLHDNDIVYRDLKPENILLDANGHIALCDFGLSK  
ScSch9 512 EDRAKFYIAELVL ALEHLHDNDIVYRDLKPENILLDANGNIALCDFGLSK

CaSch9 542 ADLNMDGTNTFCGTTEYLAP ELLDEQGYTKMVD FWSLGVLI FEMFCGW  
ScSch9 562 ADLK--DRINTFCGTTEYLAP ELLDEIGYTKMVD FWSLGVLI FEMCCGW

CaSch9 592 SPFHAENTQOMYKNIAFGKVRFPKDVLSPEGRSFVKGLLNRNPKHRLGAT  
610 SPFFAENNQKMYQKIAFGKVKFPRDVLSQEGRSFVKGLLNRNPKHRLGAI

CaSch9 642 DDARELKAHPFFADIDWDLIRAKNI PPPFKPHIVSETDISNFD EFTSEN  
ScSch9 660 DDGRELRAHPFFADIDWEALKQKKI PPPFKPHLVSETDISNFDPEFTTAS

CaSch9 692 TSAL-KRQMEIATTPLSPIQANFKGFTYVDDSTMD DHFA--RSYRANA-  
ScSch9 710 TSYMKNKHQPMMTATPLSPAMQAKFAGFTFVDESAIDEHVNMRKFLQNSY

CaSch9 738 FRPPGSFIPGDPNLPPDEEVLAEQIEEE-----DEMEVDE  
ScSch9 760 FMEPGSFIPGNPNLPPDEDVIDDDGDEDINDGFNOEKNMNNSHSQMDFDG

CaSch9 773 DQHMDDEFVNGRFDL  
ScSch9 810 DQHMDDEFVSGRFEI

## B.

```
CaRim15 1 MSNTPNKSTPEPESTVFGHSIFEHPLHHSVSERSISPRHVSKEQSNHNNH
ScRim15 1 MFNRSNTA-----
                                         *****
CaRim15 51 NHQQQQQASNSLNFSDQVSGYDYPSATIEEQID--LRLASSNPTIVMEL
ScRim15 9 GGSQAMKEGLGINKLSPISNSNSPSSLTSSNYEKYLQLATEKNPCMILEL

*****
CaRim15 99 DLDGNIRYLSKNWEYIVGT-NIKKIVNRHTSKIIIGNDDDSQVFNIAID
ScRim15 59 ELDGKVRYSQPWNITITGVADDSGSSPTYIADLILG-SDQDKGVFQKATD

CaRim15 148 AMT-REDISYKVKFITATNHTQRNKDGEEVYNDLNDLLLSRSHDDEQSGI
ScRim15 108 MLLMNDTISCTITF-----

CaRim15 197 LTPHNSMEDMAKNDNIPVNNYFEKQQQQQQQQQQQHLESSQPEPEKI
ScRim15 122 -----KI

CaRim15 247 DTSDTSSTLSSEISNDGEIIELEAQGILIHDAKTKLPTHSMWTIRPFKEI
ScRim15 124 KAADYEG--SAGCDESTITILEARGILIRDGHTQLPSHTMWIVKPRTND

CaRim15 297 -----DLELTLPIALIDLGLFGSEIFEGYLV
ScRim15 172 WSDFYANEDAQDMVIQLSDNCDDIDIQLPEEFAKTLGFGAKLIVQYLKR

CaRim15 324 LKNLGIIDEESVFPQPKMILCRICETNIPAWFIEKHSDLCVLEHRAAEKQL
ScRim15 222 IRLEMIIDEFNLELPKMELCRVCENFVPVWVLETHSQSCVCEHRTESLIQ

CaRim15 374 QYHDAIGEQKELVIRISESLAVSNQSLPLLSSSSGGSCSGLNTPPPQLLT
ScRim15 272 LLHDNLEQQAILANFTKDSEYKGSQIQVRSNNF-----LN----QVLD

CaRim15 424 NQSLCLASSASLVSSASSSSSEGESSSSSSHLILEYKGLPLPNMSDYPSPK
ScRim15 312 SLRELQDAIDINPS-----EMVDPDYH-----SLSTFPQDN

CaRim15 474 LANKILTKNFQSKNKHALMFSKFFPFGILQRIVELCDEALLVNPSTNED
ScRim15 344 -GNNNNNNNNNNNNALL--DQFP-----IQKDTVSLN

CaRim15 524 NILAFSPGSEKALNVMS--SSEFL--ETSDVAIKQLIEDTQELINDKMET
ScRim15 375 SYFQFSPRTNHNINQVTSWQSRFFLNDQDPLGLALLIHDTLDLARKKVDA

CaRim15 570 LSRLVLSILQFSEKIKHEVDTLVLCVRETVEKIKNQTIRESRECTPINND
ScRim15 425 VLRLDNAMTYSLKIKNEVNNYVQLIREQIE-INKHAALTH---PMNLR

CaRim15 620 SSISIN-----EYVPSRLETSNIKDQQQTQIEEPPPPQQQP
ScRim15 470 SSSIFHSPLQIHSQQPEAENLIYSSTPLQVQHDQCASFAPSKSHLEP

CaRim15 657 TQNIQDNYQEQPISETLNLTTT---TTTASTLQAPKPKHSISP--IISDL
ScRim15 520 IPFPVSSIEETPTANDIRHPSPLPRSCSNTVMKLPPIPRRKLDSNGLFSDA

CaRim15 702 LTPGENVITPK-DILLKESKSYNTSMSASPLNRSGLSCLTP-RPQSMVAP
ScRim15 570 YLNADIIPNPSIESTISIDRDNNTNSRGSMSKQYCGIPEATDSRTNSERP

CaRim15 750 VSTNSSSRDLESI---QVLDLSKRSENNSQYSSPERRHLSAPBPYVEK
ScRim15 620 SSSSRLGIRSRISITPRQKIEYSHVDNDDRTEMLSRDKDSLQFPQSVDT

CaRim15 797 SNLTTLOKNTAATPIASPSLTT--MEDINASATTTTTNIGGYGLGDK-
ScRim15 670 TITSSTQATTGKTKNSNNSINSVLPKLMTSISLIPRRGSPSFCNLASHS

CaRim15 844 -----KITH-----LSLNTQVPSQ-PSS-AMSSSVKSATIRPP
ScRim15 720 MQQTNSFKLIHDKSPISSPFTFSKDFLTPEQHPSNIARTDSINNAMLTSP

CaRim15 875 ---LSPLLVSTQQPQPRLSGGIRDYQVIKPIKGAFGSVFLGKRKLTGD
ScRim15 770 NMPLSPLLALINQ-TVKSPTPSKDYDILKPIKGAAGSVYLARKKLTGD

-----
CaRim15 922 YVAIKCLKKRDMIAKNQVNLNVKSERAVMMRQSDSPYVAQLYSFQSRDYL
ScRim15 819 YFAIKVLRKSDMIAKNQVNLNVKSERAIMMVQSDKPYVARLFAFQNKDNL

-----
CaRim15 972 YLVMEYLNGGDCANLLKTLGVIGVDWTPRYIAETIIVGVDDLNRGIIHRD
ScRim15 869 FLVMEYLPGGDLATLIKMMGYLPDQWAKQYLTEIVVGVNDMHQNGIIHHD

-----
CaRim15 1022 LKPDNIDLIDKNHKLKLTDFGLSRLGVVGRQQTQQRKSSSTNEQGIELFRS
ScRim15 919 LKPENLLIDNAGHVKLTDFGLSRAGLIRRHKVFPHKSSLSISSTLPIDNP
```

|         |      |                                                     |
|---------|------|-----------------------------------------------------|
| CaRim15 | 1072 | MLSEESNQKVNPG-IGTPFSLSPSLEQSRVSNFNSQQQQQQQQMGVPAG   |
| ScRim15 | 969  | ANNFTMNNNSNHSQLSTPDSFTSDHKQ----YNRSKKSSLGQY-----    |
| CaRim15 | 1121 | NAPSVSSLAAGENFVLSSTSTPLAYLESFNLSVSVSTPTGATQQQQQQQP  |
| ScRim15 | 1010 | -----EHSEYSSTST-----NSHSMTPTPSTNTVVYPS---           |
| CaRim15 | 1171 | PPKPFVKSSNGRSGSSGFDSPIILKPIIPRTESESFAIMD-----DEPSP  |
| ScRim15 | 1037 | ----YYRGKDRSHGSSNIDLPL---ASLRRSEQLSFLSLDLSRSSTPPLA  |
| CaRim15 | 1216 | GPTTDYA-----LYNPDNYKNEGATATTATAATAGTGGGGDVNAG--     |
| ScRim15 | 1080 | NPTNSNANNIMRRKSLTENKSFNDLLSSDAIAATNTNINSNNNISLSPA   |
| CaRim15 | 1256 | -----DGGGANIKKFVGTDPDYLAPEIITKSGE-NESSDWFVSVGVM     |
| ScRim15 | 1130 | PSDLALFYPPDSKQN-KKFFGTPDYLAPEITLCKGEDNKQCDWWSVGCIF  |
| CaRim15 | 1296 | FFFLYGYPPFHADTPEKVFNNLLSGKIDWPEL-TPPEEDMKFCPPDAKDLI |
| ScRim15 | 1179 | FELLLGYPPFHAETPDVAVFKLLSGVIQWPEFKNEEEEREFLTPEAKDLI  |
| CaRim15 | 1345 | NKLLVMNPEERLGFNGADEIKNHPYFKNIHWDTLFEEPAPFTMLDDPES   |
| ScRim15 | 1229 | EKLLVVDPAKRLGAKGIQEIKDHPYFKNVDWDHVYDEEASFVPTIDNPED  |
| CaRim15 | 1395 | TDYFDSRGAMMTQFPKEEDSQSSS-----SSQSSDGETKPEEN         |
| ScRim15 | 1279 | TDYFDLRGAEQLQDFGDDIENDNANILFGKHGINTDVSELSAANLSPPLNH |
| CaRim15 | 1433 | EN---EKDIVVTNTRSSSTGHIH-----RQKSL-----DRN           |
| ScRim15 | 1329 | KNILSRKLSMSNTNTRSSNNNSNSVHDFGAHTPVNKLSTIASVLESVPQET |
| CaRim15 | 1463 | SSISSNDSGSLSLPGSSSIN---NITPTTTKKERRSSKLADP-SEFGSF   |
| ScRim15 | 1379 | GYITPNGTGTTTSAKNSPNLKNLSLAIPPHMRDRSSKLNDSQTEFGSF    |
| CaRim15 | 1508 | HFRNLAVLERQNKDVINRLKTEHLEHRGSFSTSSSESTPTGRSRGFSFG   |
| ScRim15 | 1429 | NFRNLSALDKANKDAINRLKSEHFSEQPGVHRRTSSASL-MGSSSDGSVVS |
| CaRim15 | 1558 | NACNSGSSSSCGGGGGVGTSGSPFKRPISPPSFNANQSSGLGSPVITT    |
| ScRim15 | 1478 | TPGSNASNTTSG-----KLKIHKPTISGSPSTFGTFPKTFL           |
| CaRim15 | 1608 | SSGAMGIINTNPVNIITTTSSNHNHNSFNTVGGGLGIGTATATTAAATTA  |
| ScRim15 | 1515 | RSDFSTRSYSPERSISIDSSTLRKGSI-----IGDNQOTTANSSDS      |
| CaRim15 | 1658 | TTTTGSIRSASPHRLFESPNIKHERIPSATSAVSSGDEIMISPLMIHH    |
| ScRim15 | 1558 | PTMT-----KFKSPLSPAN---TTTVSSYFSRQRVL-----           |
| CaRim15 | 1708 | DDRNHHSRSSSLPYLQTITKQPSFSLNHNHIIRDFSSPNSSD--SEDTT   |
| ScRim15 | 1586 | -----SKSFS-----QRTNSSDLSAEESD                       |
| CaRim15 | 1756 | KSNALLRVQRRESSRMSTELLSGTNTGGGGGAGGGTSSNNSSVIVADL    |
| ScRim15 | 1605 | RLQAISRVSRLRNR---SG-----RKSSSTSEIGYHM               |
| CaRim15 | 1806 | DVLYCEPISVIRHSVVKLLEKAGCIVVSVTDGELIKRATSQVKFDLIFT   |
| ScRim15 | 1636 | DVLYCEPIPIHRYRVTKDLENLGCIVVSVGAGDELVSRATSGVDFDLIMT  |
| CaRim15 | 1856 | GLKISKVDAIDAVKLIKFTSGKNRNTPIIGITENKNKIDDDITTSSTFDY  |
| ScRim15 | 1686 | ALKLPKLGALDIVQLLKQTNGANSTPIVAIT----NYFQEAATSRVFD    |
| CaRim15 | 1906 | IIEP--NLEAISKVCR-----ILRS-----                      |
| ScRim15 | 1732 | VLEKPVKLDLKKLVAKYALKKSQEDEEHTLLSDSDETH              |

**Supplemental Figure 1.** Sequence comparisons of *C. albicans* and *S. cerevisiae* Sch9 (A) and Rim15 (B) proteins. Identical residues are marked by black backgrounds, the contiguous kinase homology domain in Sch9 and the interrupted domain in Rim15 are indicated by the top lines. Six Ser/Thr sites phosphorylated in ScSch9 by ScTor1 and the single Ser residue in ScRim15 (S1061) phosphorylated by ScSch9 are indicated by red circles. The PAS core domain in ScRim15 is marked by asterisks.
