# Supplementary material
Source: PubMed Central journal article supplement (PMC3127645)
Supplement: supp_10_4_502__2.pdf [file supp_10_4_502__2.pdf]

**Supplemental Table 1. List of oligonucleotides<sup>1</sup>**

| name                   | sequence (5'-)                        |
|------------------------|---------------------------------------|
| CaSCH9-disI/for        | TTA <u>A</u> GATCTACGAAAGTACGTAGAGAAC |
| CaSCH9-disI/rev        | TTAGGATCCTGATTTTGCAAAATCTACC          |
| CaSCH9/disII-for       | TTAAGATCTGATGAATTTGTCAATGG            |
| CaSCH9/disII-rev       | TTATCTACTAACCTCAAGGATCCCATAG          |
| CaSCH9-BHI/ for        | TTAGGATCCTTAATGGTAGATTTTGC            |
| CaSCH9-BglII/rev       | TTAAGATCTCTAAAGATCAAATCTTCCATTG       |
| CaRIM15disI-for        | ATTAGATCTAAGGACCGTTATGACAAC           |
| CaRIM15disI-rev        | ATTGGATCCTATTAGGAGTATTCGAC            |
| CaRIM15disII-for       | ATTCATCAGATCTGGAAGATACTAC             |
| CaRIM15disII-rev       | ATTGGATCCTGTTGTAGAAGCCATTG            |
| RIM15-Start            | TTAGGATCCATTATGTGCAATACTCCC           |
| RIM15-Stop             | TAAGGATCCTAATTAACCTACGTAATATCC        |
| Rnr22 for (qPCR)       | GAGACGAAGGGATTCACACA                  |
| Rnr22 rev(qPCR)        | CGCATCGCTGAAATATTCTT                  |
| Ece1 for (qPCR)        | CTAATGCCGTCGTCAGATTG                  |
| Ece1 rev (qPCR)        | TCGATGGATTGTTGAACACC                  |
| Orf 19.5831 for (qPCR) | TAAATGAGCGGTCCATGAAA                  |
| Orf 19.5831 rev (qPCR) | GCTCTTCTTTGGTAGCGTCA                  |
| Czf1 for (qPCR)        | TCGAACCCAGTCACAACAAT                  |
| Czf1 rev (qPCR)        | GCTGCTCTGATGGAGACAAA                  |
| ERG11 for (qPCR)       | GAGACGTGATGCTGCTCAA                   |
| ERG11 rev (qPCR)       | CACACCATCTTTATAAGTTGAATGAA            |
| Sch9 for (qPCR)        | TTTCTGGTCATTAGGAGTGTTGA               |
| Sch9 rev (qPCR)        | AAAGGATCGACCTTCTGGAC                  |

<sup>1</sup>Relevant subsequences are underlined.
